# Supplementary material for: The ubiquitin ligase Cullin5SOCS2 regulates NDR1/STK38 stability and NF-κB transactivation
Source: PubMed Central journal article supplement (PMC5316984; doi:10.1038/srep42800), 2017-02-20
Supplement: srep42800-s1.pdf [file srep42800-s1.pdf]

## **SUPPLEMENTARY INFORMATION**

# **The ubiquitin ligase Cullin5<sup>SOCS2</sup> regulates NDR1/STK38 stability and NF- $\kappa$ B transactivation**

Indranil Paul<sup>1\*</sup>, Tanveer S. Batth<sup>1</sup>, Diego Iglesias-Gato<sup>2</sup>, Amna Al-Araimi<sup>3</sup>, Ibrahim Al-Haddabi<sup>3</sup>, Amira Alkharusi<sup>3</sup>,  
Gunnar Norstedt<sup>4</sup>, Jesper V Olsen<sup>1</sup>, Fahad Zadjali<sup>3</sup>, Amilcar Flores-Morales<sup>1,2\*</sup>

## SUPPLEMENTARY FIGURES

Figure S1

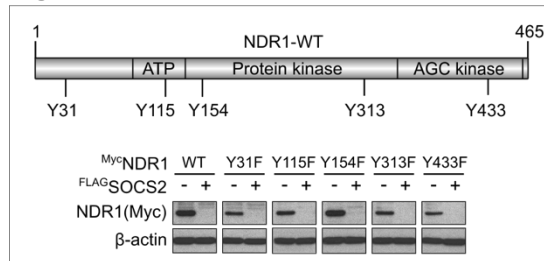

**Figure S1** - Plasmids expressing Myc-NDR1 wild type and its various point mutants (Y $\rightarrow$ F, as indicated) were transfected along with FLAG-SOCS2 in HEK293T cells and lysates were probed by IB.

Figure S2

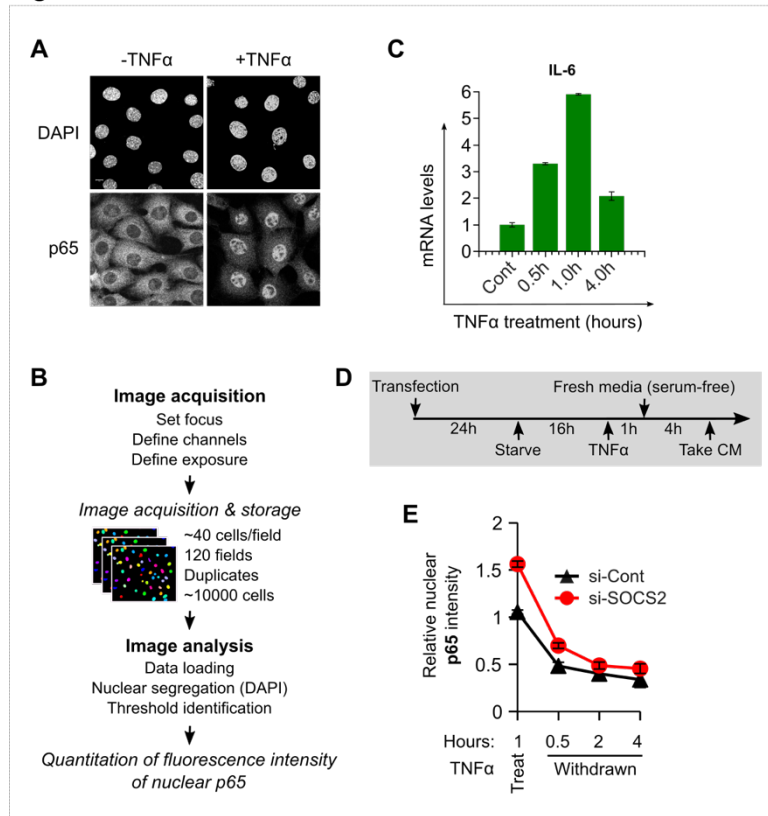

**Figure S2** – (A) Representative confocal images for localization of p65 in MEFs treated with TNF $\alpha$  (10 ng/ml) for 1 hour. Magnification=1000X. (B) Schematic workflow for high-content quantitative imaging. (C) Quantitative RT-PCR analysis of NF- $\kappa$ B target gene IL-6 using total RNAs extracted from MEFs treated with TNF $\alpha$  for indicated time points. 18S rRNA was used as internal control. At 1.0 hour time point the transcriptional activity was found to be maximal. (D) Schematic timeline for treatments for preparation of conditioned media (CM). (E) MEFs were transfected with either NT siRNA or SOCS2 siRNA as shown. After 36 hours cells were pulsed with TNF $\alpha$  (10 ng/ml) for 1 hour. Then TNF $\alpha$  was withdrawn and cells were incubated in fresh serum-free media for indicated time points before being harvested and processed for HCQI.

Figure S3

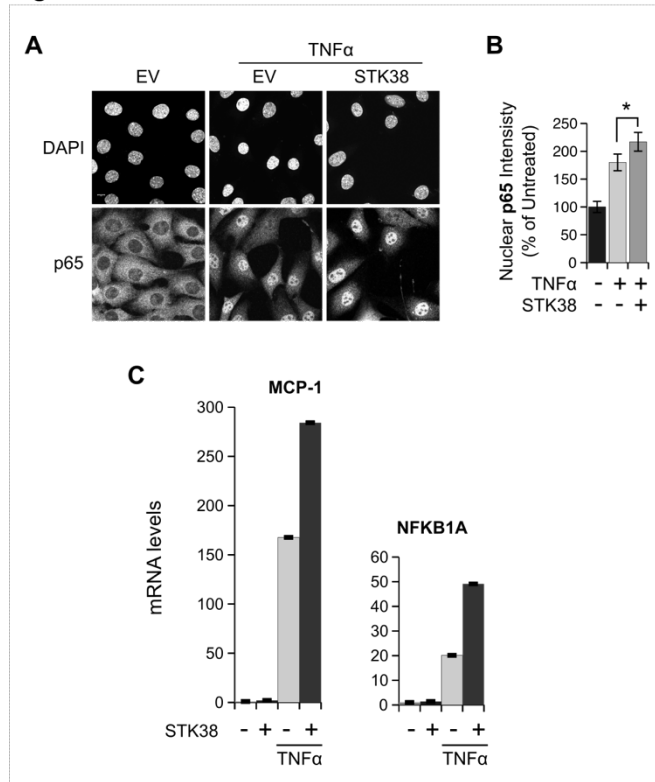

**Figure S3 – (A)** Representative confocal images for localization of p65 in MEFs transfected with STK38 and treated with TNF $\alpha$  (10 ng/ml) for 1 hour, as shown. Magnification=1000X. **(B)** Bar graph showing nuclear staining intensities of p65 from confocal images in (A) quantified using ImageJ. **(C)** Quantitative RT-PCR analysis of NF- $\kappa$ B target genes using total RNAs extracted from MEFs transfected with STK38 and treated with TNF $\alpha$  for 1 hour. 18S rRNA was used as internal control.

Figure S4

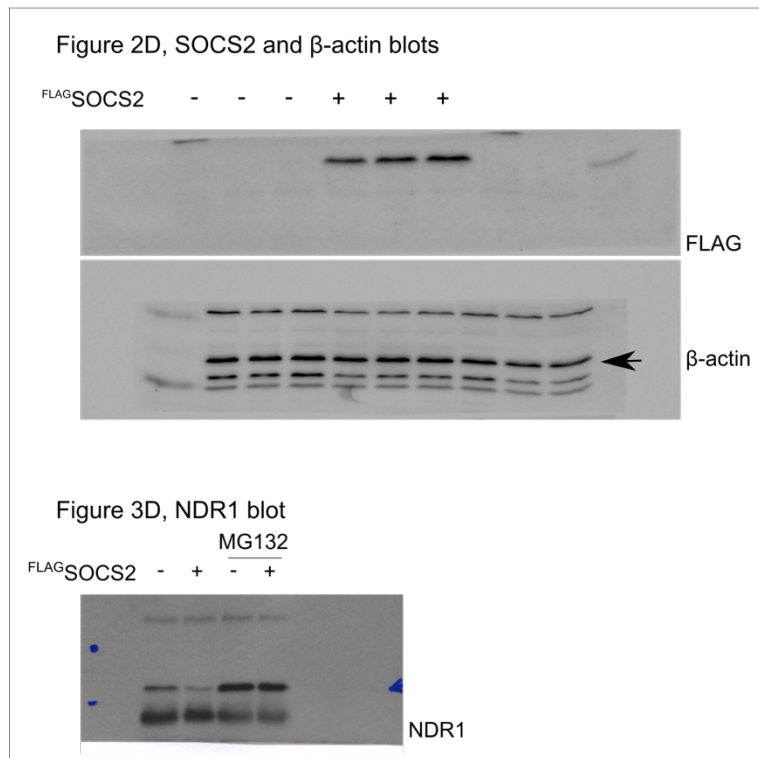

**Figure S4.** Uncropped blots for gels tightly cropped to show relevant bands in the main figure.

## SUPPLEMENTARY TABLES

**Table S1** – List of all proteins identified in the proteomic screen. [Provided as a separate spreadsheet.](#)

**Table S2** - Target sequences of siRNAs used.

| Name of gene  | Name of siRNA | Target sequence       |
|---------------|---------------|-----------------------|
| SOCS2         | SOCS2#2       | cgcattcagactacctactaa |
|               | SOCS2#6       | atgcagctatgtgaaagagaa |
|               | SOCS2#8       | atgtgtcaagtccaagcttaa |
|               |               |                       |
| STK38         | STK38#1       | tgcgatatctattgaaatcaa |
|               | STK38#3       | gaggatagaatttaagactta |
|               |               |                       |
| Non-targeting | Control       | cagggtatcgacgattacaaa |

**Table S3** – Sequences for qPCR primers (mouse) used.

| Target       | Sequence (5'-3')                                             |
|--------------|--------------------------------------------------------------|
| 18S          | For – gtaaccggtgaacccatt<br>Rev - ccatccaatcggtagtagcg       |
| STK38        | For - gaccccacaagagacatacaag<br>Rev - ggctccgattctatgttccc   |
| SOCS2        | For - aggtacaggtgaacagtccatt<br>Rev - tccagatgtgcaaggataaacg |
| IL-6         | For - ctgatgctggtgacaaccac<br>Rev - tccacgattcccagagaac      |
| NFKB1A       | For - accaaggctactccccctac<br>Rev - ctctcctcatcctcgctctc     |
| MCP-1        | For - cccaatgagtaggctggag<br>Rev - tctggaccattccttcttg       |
| Arginase-1   | For - ctccaagccaaagtccttagag<br>Rev - aggagctgcattagggacatc  |
| iNOS         | For - gttctcagcccaacaatacaaga<br>Rev - gtggacgggtcgatgtcac   |
| TNF $\alpha$ | For - gcctcttctcattcctgcttg<br>Rev - ctgatgagaggaggccatt     |

**Table S4** – Histologic colitis scoring guideline.

| <b>Feature</b>          | <b>Score</b> | <b>Description</b>          |
|-------------------------|--------------|-----------------------------|
| Inflammation severity   | 0            | None                        |
|                         | 1            | Mild                        |
|                         | 2            | Moderate                    |
|                         | 3            | Severe                      |
| Inflammation extent     | 0            | None                        |
|                         | 1            | Mucosa                      |
|                         | 2            | Submucosa                   |
|                         | 3            | Transmural                  |
| Crypt damage            | 0            | None                        |
|                         | 1            | Basal $\frac{1}{3}$ damaged |
|                         | 2            | Basal $\frac{2}{3}$ damaged |
|                         | 3            | Crypt lost                  |
|                         | 4            | Surface epithelial lost     |
| Ulcer                   | 4            |                             |
| Lymphocyte infiltration | 3            |                             |
| Neutrophil infiltration | 2            |                             |
| Cryptitis               | 3            |                             |
| Crypt abscess           | 3            |                             |
| Edema                   | 4            |                             |
| Goblet cell depletion   | 3            |                             |
